# Supplementary material for: A prognostic model based on autophagy-and senescence-related genes for gastric cancer: implications for immunotherapy and personalized treatment
Source: Front Oncol. 2025 Mar 20;15:1509771. doi: 10.3389/fonc.2025.1509771 (PMC11965130; doi:10.3389/fonc.2025.1509771)
Supplement: Supplementary file 7 [file DataSheet7.xlsx]

## Sheet: List of overlapping genes assoc
Gene Symbol
ATG5
BECN1
ATG16L1
ULK1
AMBRA1
ATG12
ATG7
SQSTM1
ATG14
ATG3
ATG13
ATG10
ATG9B
MAP1LC3B
MAP1LC3A
MTOR
PIK3C3
LAMP2
BCL2
MAP1LC3C
RB1CC1
GABARAP
GABARAPL2
HMGB1
GABARAPL1
UVRAG
TP53
VCP
OPTN
HDAC6
PRKAA1
MIR7-3HG
AKT1
SIRT1
PRKAA2
PRKN
SH3GLB1
SCARNA5
SOD2-OT1
FOXO3
H19
KEAP1
NFE2L2
PINK1
LINC01672
UBC
GSK3B
CERNA3
BDNF-AS
HSPA8
HSP90AA1
LRRK2
TMX2-CTNND1
SNCA
MALAT1
MFN2
LAMP1
CASP3
HIF1A
BCL2L1
MEG3
STAT3
MAPK8
STK11
TRAF6
ULK3
EMSLR
MAPK14
PTEN
ZKSCAN3
MAPK1
TGFB1
STING1
SOD1
SIRT2
MIR493HG
ENSG00000276919
CTSD
RPS6KB1
GAS5
ENDOG
MLST8
IL6
CASP8
PARP1
MCL1
BAG3
PRKAB1
PFN1
BAX
PVT1
EGFR
SRC
IFNG
TRC-GCA24-1
MAPT
CTSB
HMOX1
HNRNPA1
SPTLC1
DNM1L
NLRP3
HDAC1
RPS27A
FOXO1
NUPR1
PIK3CA
MYC
HSPA5
TNF
XIST
IL1B
ATM
KRAS
CDKN2A
PIK3CB
RNASEL
AURKA
HSF1
IGF1
ENSG00000277577
LEP
KAT5
IFNB1
CASP9
CXCR4
BRAF
LINC02605
BAD
MIR376B
CDKN1A
HDAC4
PPARGC1A
PGR-AS1
MIR125A
CYCS
VIM
NFKB1
ENSG00000275307
ENSG00000276965
EIF2AK3
LGALS3
PHB2
BIRC5
MDM2
RHEB
PIM1
TOM1
HDAC9
CAV1
SMAD5-AS1
IFI16
ABL1
HSP90AB1
PIK3R2
INS
YWHAZ
APP
PKM
LMNA
UBB
AKT1S1
HSPB1
MIR155
AURKB
CTNNB1
CXCL8
FAS
MIR216A
JUN
ATF6
MIR30A
HRAS
OPA1
INSR
EEF1A1
MIR17
CSNK2A1
MFN1
NOTCH1
MIR133B
TXN
HDAC2
PRKDC
SIRT6
TNFSF10
SMAD4
GAPDH
YAP1
YWHAB
MIR21
TNFRSF10B
MAPK3
TRE-TTC3-1
CD44
DCN
E2F1
CDKN1B
TLR4
SMAD3
RAF1
RB1
STUB1
CEBPB
APOE
TRIM32
PIK3CG
ITGB4
LINC-ROR
CASP1
ANG
EIF2AK4
MIR34A
MIR20A
PIK3R1
ELAVL1
BAK1
IGF1R
RELA
KCNQ1OT1
HSPA4
HMGA1
YY1
MAP2K1
BANCR
CGAS
ISG15
PPP2CA
SNORD15A
TRP-AGG2-5
TRP-AGG2-6
TRP-AGG2-1
TRP-AGG2-4
TRP-AGG2-3
TRP-AGG2-2
TRP-AGG2-7
TRP-AGG2-8
RSL1D1
MIR143
IL10
UBA52
PSMC4
RNU6-1
RNU6-2
RNU6-9
IRF1
VHL
RNU6-7
RNU6-8
RNU6-1-001
RNU6-1-002
RNU6-1-003
RNU6-1-004
MAP3K5
CCAR2
EIF2AK2
SIRT3
TRA-TGC7-1
TRA-TGC5-1
ITGB3
MIR320A
MIR34C
ERBB2
JAK2
VEGFA
TLR2
SERPINF1
MAPK9
MIR211
LMNB1
FKBP8
TRV-AAC1-1
TRV-AAC1-3
TRV-AAC1-4
TRV-AAC1-2
TRV-AAC1-5
MET
DAO
CHKB-CPT1B
NBR2
IL6ST
SGPP1
COL1A1
CDK5
CLU
HOTAIR
FN1
MIR543
MIR30D
AGER
MIRLET7C
LINC00504
TTTY10
LINC02882
ARF4-AS1
LINC01258
LINC01725
LINC02955
LINC02895
ENSG00000245768
ENSG00000250519
ENSG00000258081
ENSG00000230490
ENSG00000235450
ENSG00000251216
LOC101927560
ENSG00000253288
lnc-IQCM-2
lnc-HMGXB4-8
MK280073-022
MK280073-023
MK280073-058
MK280073-120
MK280073-197
MK280073-202
MK280073-346
MK280073-501
MK280073-521
MK280073-008
MK280073-013
MK280073-020
MK280073-025
MK280073-049
MK280073-052
MK280073-055
MK280073-059
MK280073-060
MK280073-063
MK280073-083
MK280073-093
MK280073-121
MK280073-164
MK280073-175
MK280073-199
MK280073-203
MK280073-206
MK280073-216
MK280073-273
MK280073-296
MK280073-300
MK280073-334
MK280073-351
MK280073-353
MK280073-460
MK280073-461
MK280073-475
MK280073-493
MK280073-510
MK280073-513
MK280073-522
MK280073-524
MK280073-527
MK280073-571
MK280073-621
MK280073-623
MK280073-007
MK280073-018
MK280073-027
MK280073-028
MK280073-030
MK280073-040
MK280073-044
MK280073-072
MK280073-081
MK280073-082
MK280073-090
MK280073-091
MK280073-115
MK280073-117
MK280073-123
MK280073-140
MK280073-149
MK280073-150
MK280073-153
MK280073-176
MK280073-180
MK280073-182
MK280073-205
MK280073-207
MK280073-243
MK280073-283
MK280073-295
MK280073-354
MK280073-359
MK280073-389
MK280073-453
MK280073-456
MK280073-464
MK280073-468
MK280073-470
MK280073-473
MK280073-490
MK280073-519
MK280073-523
MK280073-525
MK280073-533
MK280073-544
MK280073-557
MK280073-561
MK280073-586
MK280073-609
MK280073-001
MK280073-002
MK280073-003
MK280073-004
MK280073-005
MK280073-006
MK280073-009
MK280073-010
MK280073-011
MK280073-012
MK280073-014
MK280073-015
MK280073-016
MK280073-017
MK280073-019
MK280073-021
MK280073-024
MK280073-026
MK280073-029
MK280073-031
MK280073-032
MK280073-033
MK280073-034
MK280073-035
MK280073-036
MK280073-037
MK280073-038
MK280073-039
MK280073-041
MK280073-042
MK280073-043
MK280073-045
MK280073-046
MK280073-047
MK280073-048
MK280073-050
MK280073-051
MK280073-053
MK280073-054
MK280073-056
MK280073-057
MK280073-061
MK280073-062
MK280073-064
MK280073-065
MK280073-066
MK280073-068
MK280073-069
MK280073-070
MK280073-071
MK280073-073
MK280073-074
MK280073-075
MK280073-076
MK280073-077
MK280073-078
MK280073-079
MK280073-080
MK280073-084
MK280073-085
MK280073-086
MK280073-087
MK280073-088
MK280073-089
MK280073-092
MK280073-094
MK280073-095
MK280073-096
MK280073-097
MK280073-098
MK280073-101
MK280073-102
MK280073-103
MK280073-104
MK280073-105
MK280073-106
MK280073-107
MK280073-108
MK280073-109
MK280073-110
MK280073-111
MK280073-112
MK280073-113
MK280073-114
MK280073-116
MK280073-118
MK280073-119
MK280073-122
MK280073-124
MK280073-125
MK280073-126
MK280073-127
MK280073-128
MK280073-131
MK280073-132
MK280073-133
MK280073-134
MK280073-135
MK280073-136
MK280073-137
MK280073-138
MK280073-139
MK280073-141
MK280073-142
MK280073-143
MK280073-144
MK280073-145
MK280073-146
MK280073-147
MK280073-148
MK280073-151
MK280073-152
MK280073-154
MK280073-155
MK280073-156
MK280073-157
MK280073-158
MK280073-159
MK280073-160
MK280073-161
MK280073-162
MK280073-163
MK280073-165
MK280073-168
MK280073-169
MK280073-170
MK280073-171
MK280073-172
MK280073-173
MK280073-174
MK280073-177
MK280073-178
MK280073-179
MK280073-181
MK280073-183
MK280073-184
MK280073-185
MK280073-186
MK280073-187
MK280073-188
MK280073-189
MK280073-190
MK280073-191
MK280073-192
MK280073-193
MK280073-194
MK280073-195
MK280073-196
MK280073-198
MK280073-200
MK280073-201
MK280073-204
MK280073-208
MK280073-209
MK280073-210
MK280073-211
MK280073-212
MK280073-213
MK280073-214
MK280073-215
MK280073-217
MK280073-218
MK280073-219
MK280073-220
MK280073-221
MK280073-222
MK280073-224
MK280073-225
MK280073-226
MK280073-227
MK280073-228
MK280073-229
MK280073-230
MK280073-231
MK280073-232
MK280073-233
MK280073-234
MK280073-235
MK280073-236
MK280073-237
MK280073-238
MK280073-239
MK280073-240
MK280073-241
MK280073-242
MK280073-244
MK280073-245
MK280073-246
MK280073-247
MK280073-248
MK280073-249
MK280073-250
MK280073-251
MK280073-252
MK280073-253
MK280073-255
MK280073-257
MK280073-258
MK280073-259
MK280073-260
MK280073-261
MK280073-262
MK280073-264
MK280073-265
MK280073-266
MK280073-267
MK280073-268
MK280073-269
MK280073-270
MK280073-271
MK280073-272
MK280073-274
MK280073-275
MK280073-276
MK280073-277
MK280073-278
MK280073-279
MK280073-280
MK280073-281
MK280073-282
MK280073-284
MK280073-285
MK280073-286
MK280073-287
MK280073-288
MK280073-289
MK280073-290
MK280073-291
MK280073-292
MK280073-293
MK280073-294
MK280073-297
MK280073-298
MK280073-299
MK280073-301
MK280073-302
MK280073-303
MK280073-304
MK280073-305
MK280073-306
MK280073-307
MK280073-308
MK280073-309
MK280073-310
MK280073-311
MK280073-312
MK280073-313
MK280073-314
MK280073-315
MK280073-316
MK280073-317
MK280073-318
MK280073-319
MK280073-320
MK280073-321
MK280073-322
MK280073-323
MK280073-324
MK280073-325
MK280073-326
MK280073-328
MK280073-329
MK280073-330
MK280073-331
MK280073-332
MK280073-333
MK280073-335
MK280073-336
MK280073-337
MK280073-338
MK280073-339
MK280073-340
MK280073-341
MK280073-342
MK280073-343
MK280073-344
MK280073-345
MK280073-347
MK280073-348
MK280073-349
MK280073-350
MK280073-352
MK280073-355
MK280073-356
MK280073-357
MK280073-358
MK280073-360
MK280073-361
MK280073-362
MK280073-363
MK280073-364
MK280073-365
MK280073-366
MK280073-367
MK280073-368
MK280073-369
MK280073-370
MK280073-371
MK280073-372
MK280073-373
MK280073-374
MK280073-375
MK280073-376
MK280073-377
MK280073-378
MK280073-379
MK280073-380
MK280073-381
MK280073-382
MK280073-383
MK280073-384
MK280073-385
MK280073-386
MK280073-387
MK280073-388
MK280073-390
MK280073-391
MK280073-395
MK280073-396
MK280073-397
MK280073-398
MK280073-399
MK280073-402
MK280073-403
MK280073-404
MK280073-405
MK280073-406
MK280073-407
MK280073-409
MK280073-410
MK280073-411
MK280073-412
MK280073-413
MK280073-414
MK280073-415
MK280073-416
MK280073-417
MK280073-418
MK280073-419
MK280073-420
MK280073-427
MK280073-428
MK280073-430
MK280073-431
MK280073-432
MK280073-433
MK280073-434
MK280073-435
MK280073-436
MK280073-437
MK280073-438
MK280073-439
MK280073-440
MK280073-441
MK280073-442
MK280073-443
MK280073-444
MK280073-445
MK280073-446
MK280073-447
MK280073-448
MK280073-449
MK280073-450
MK280073-451
MK280073-452
MK280073-454
MK280073-455
MK280073-457
MK280073-458
MK280073-459
MK280073-462
MK280073-463
MK280073-465
MK280073-466
MK280073-467
MK280073-469
MK280073-471
MK280073-472
MK280073-474
MK280073-476
MK280073-477
MK280073-478
MK280073-479
MK280073-480
MK280073-481
MK280073-482
MK280073-483
MK280073-484
MK280073-485
MK280073-486
MK280073-487
MK280073-488
MK280073-491
MK280073-492
MK280073-494
MK280073-495
MK280073-496
MK280073-497
MK280073-498
MK280073-499
MK280073-500
MK280073-502
MK280073-503
MK280073-504
MK280073-505
MK280073-506
MK280073-507
MK280073-508
MK280073-509
MK280073-511
MK280073-512
MK280073-514
MK280073-515
MK280073-516
MK280073-517
MK280073-518
MK280073-526
MK280073-528
MK280073-529
MK280073-530
MK280073-531
MK280073-532
MK280073-534
MK280073-535
MK280073-536
MK280073-537
MK280073-538
MK280073-540
MK280073-541
MK280073-542
MK280073-543
MK280073-545
MK280073-546
MK280073-547
MK280073-548
MK280073-549
MK280073-550
MK280073-551
MK280073-552
MK280073-553
MK280073-554
MK280073-555
MK280073-556
MK280073-558
MK280073-559
MK280073-560
MK280073-562
MK280073-563
MK280073-564
MK280073-565
MK280073-566
MK280073-567
MK280073-568
MK280073-569
MK280073-570
MK280073-572
MK280073-573
MK280073-574
MK280073-575
MK280073-577
MK280073-578
MK280073-579
MK280073-580
MK280073-581
MK280073-582
MK280073-583
MK280073-584
MK280073-585
MK280073-588
MK280073-589
MK280073-590
MK280073-591
MK280073-592
MK280073-593
MK280073-594
MK280073-595
MK280073-596
MK280073-597
MK280073-598
MK280073-599
MK280073-600
MK280073-601
MK280073-606
MK280073-615
MK280073-618
MK280073-624
MK280073-625
MK280073-629
MK280073-654
MK280073-655
MK280073-656
MK280073-659
MK280073-670
MK280073-674
MK280073-676
MK280073-678
MK280073-683
MK280073-686
MK280073-688
MK280073-689
MK280073-691
lnc-LRP5L-15
MK280073-067
MK280073-099
MK280073-100
MK280073-129
MK280073-130
MK280073-166
MK280073-167
MK280073-223
MK280073-254
MK280073-256
MK280073-263
MK280073-327
MK280073-392
MK280073-393
MK280073-394
MK280073-400
MK280073-401
MK280073-408
MK280073-421
MK280073-422
MK280073-423
MK280073-424
MK280073-425
MK280073-426
MK280073-429
MK280073-489
MK280073-520
MK280073-539
MK280073-576
MK280073-587
MK280073-602
MK280073-603
MK280073-604
MK280073-605
MK280073-607
MK280073-608
MK280073-610
MK280073-611
MK280073-612
MK280073-613
MK280073-614
MK280073-616
MK280073-617
MK280073-619
MK280073-620
MK280073-622
MK280073-626
MK280073-627
MK280073-628
MK280073-630
MK280073-631
MK280073-632
MK280073-633
MK280073-634
MK280073-635
MK280073-636
MK280073-637
MK280073-638
MK280073-639
MK280073-640
MK280073-641
MK280073-642
MK280073-643
MK280073-644
MK280073-645
MK280073-646
MK280073-647
MK280073-648
MK280073-649
MK280073-650
MK280073-651
MK280073-652
MK280073-653
MK280073-657
MK280073-658
MK280073-660
MK280073-661
MK280073-662
MK280073-663
MK280073-664
MK280073-665
MK280073-666
MK280073-667
MK280073-668
MK280073-669
MK280073-671
MK280073-672
MK280073-673
MK280073-675
MK280073-677
MK280073-679
MK280073-680
MK280073-681
MK280073-682
MK280073-684
MK280073-685
MK280073-687
MK280073-690
MK280073-692
MK280073-693
MK280073-694
MK280073-695
MK280073-696
MK280073-697
MK280073-698
MK280073-699
MK280073-700
MK280073-701
MK280073-702
MK280073-703
MK280073-704
MK280073-705
MK280073-706
MK280073-707
MK280073-708
MK280073-709
MK280073-710
MK280073-711
MK280073-712
MK280073-713
MK280073-714
MK280073-715
MK280073-716
MK280073-717
MK280073-718
MK280073-719
MK280073-720
MK280073-721
MK280073-722
CTSK
IL6R
TUBA1C
GJA1
AR
ACACA
FBXW7
PABPC1
TUBB
NPM1
XPO1
MIAT
OLR1
DLEU2
DAXX
MIR335
CDK1
ACTB
SNHG6
MMP14
MIR193A
ANXA5
JAK1
CALR
PCNA
BHLHE40
PEA15
MIR146A
BMI1
TNFSF11
MIR146B
EPHA3
DYNC1I1
HSPA9
IL4
ARG2
LDHA
MIR181A1
NRAS
PPARG
MIR494
EP300
SPARC
RAN
EEF2
HNRNPK
TUBB2A
MIR373
NQO1
CCT2
H2BC3
PWAR1
WNT5A
LINC01554
MECP2
CHUK
FIS1
CCND1
CLOCK
IL24
TLR3
IL17A
XRCC5
RBX1
BMAL1
SNORD118
PLK1
ING1
SUMO1
PDPK1
PHB1
ROCK1
HDAC3
SND1
PGK1
MIR15B
MIR23B
RAB4B-EGLN2
RAC1
MYH9
RNF2
DICER1
HOTTIP
MIR101-1
THBS1
EIF4G1
TP53BP2
CD4
RUNX2
TRIB3
MIR125B1
HCCAT5
MIR24-1
MIR22
CKAP4
MAP2K3
HNRNPM
GSN
SIRT5
PDK1
G3BP1
MIR18A
CHEK1
MIR98
NAMPT
GRN
SMAD2
ESR2
HIPK2
MIR381
MIR205
ANXA2
U2AF1
DDX5
MIR15A
CREB1
SPP1
MIR23A
CASP2
LMNB2
MIR26B
NUAK2
STAT1
MIR93
PTPN11
IGFBP3
CUL4B
MIR301B
EZH2
YBX1
TP73
SERPINE1
SLC3A2
RUVBL2
RARS1
ESR1
PPARA
EWSR1
IL2RA
MAPK10
MIRLET7G
ILK
SREBF1
ENSG00000276609
ENSG00000277469
ENSG00000277553
ENSG00000278708
RPS2
NOS2
DNMT1
HSPD1
CD40LG
GLS
APEX1
HSPA1A
JUP
IGFBP5
IKBKG
BRD4
DHX9
PTBP1
MIR16-1
SNORD44
SPHK1
COL10A1
CHEK2
MIR215
ZMPSTE24
BMP4
PTK2
LBR
RPS16
MBP
SOD2
KLF4
FASLG
FOXM1
HGF
CREG1
GNL3
PSAP
NCL
PWAR4
PTGS2
SKP2
WNT16
MIR181A2
SFTA3
KDM1A
NTRK1
TERT
MIR30E
PRKCD
MIR126
XRCC6
CYTOR
AKT3
FASN
EIF5A
RPL7A
MIR106B
HSPA1B
MIR223
ENO1
VTI1B
IL13
KL
RUVBL1
PRMT5
GRB2
RPS17
AIM2
MIR221
LONP1
FGF1
RPL7
DYNC1I2
RPS3A
PML
CCL2
TFAM
THORLNC
DNAJA1
SERPINB5
SLC39A1
IL3
ADIPOQ
MIR20B
IL1A
SETD2
PFKFB3
TGFBR2
FLT3
AHR
RPS6
XDH
MCM7
CBS
ACLY
SP1
PDIA6
RPL8
H2AX
SKP1
EHMT2
SRSF7
BAG2
SMURF1
RHOA
RPS19
CSDE1
SOX2
PRDX1
MIR214
SNHG12
BMP2
RPA1
RPL27
MMP9
CDK6
TP63
FMR1
IRF5
TRIM28
METTL3
PIK3CD
USP7
DELEC1
PPP1R12A
RNY5
ING2
KDM4A
UNC5B
UBE2D1
PTPA
BRCA1
NCOR1
NEDD8
IDO1
BACE1
PRDX2
BCYRN1
HADHB
GDF15
MAP2
PXN
YTHDF2
PRPF19
KAT2B
TKT
H1-2
AGO2
RMRP
NGFR
PPP1R13L
IL7R
RASSF5
CCNB1
MIR29A
SRSF3
LOC654780
EGR1
XAF1
EEF1B2
ILF3
CREBBP
MIR27A
IFI27
TXNIP
RAD51
SIRT7
TNFSF15
MIF
UHRF1
DEK
H3C1
TP53BP1
PRODH
RASSF1
FGF21
PLA2G6
APOL1
ASS1
IRAK1
TOP1
SGK1
NCOA3
CD47
MIR30C1
EIF5B
CFL1
PLAU
CDC25B
KDR
CLDN1
HNF1A-AS1
MIR449A
SLC25A5
MDH1
FGFR2
MYO1B
SERPINH1
MIRLET7I
BAG5
MIR29C
HNRNPL
GATA4
CIP2A
RPL5
CCNA2
MIR107
SMARCB1
ATR
GLO1
RPL28
MKI67
TERC
PIN1
KIT
RPS13
MITF
MCM2
LYN
CDK4
CBX3
PRMT1
CERS2
MIR100
TNFRSF11B
BMP6
CKB
ALK
BTRC
RARA
MIR378A
PDHA1
MARCHF5
MIRLET7A1
CD36
UCP2
SERPINB2
PGR
PLA2G4A
PEBP1
METTL14
MIR222
MDH2
POU5F1
GLI1
SRSF1
CARM1
CDK2
ARF1
RPS18
B2M
LATS2
MIR203A
IRF7
TGFB2
HSPA2
GSR
FGF2
MACROH2A1
CDC42
UBE2I
GNB2
PRKD1
PCK2
CAT
RBM39
MIR31
KMT2A
COL3A1
TFAP2A
SFN
VTN
CXCL1
AGR2
SMARCA4
AIMP2
HNRNPD
MIR185
NF1
MIR424
PTPN6
RBBP7
CDK7
GNAS
MDC1
HSPA6
E2F4
CTSZ
NOX4
TPR
NR1H2
ZFP36
FGFR1
MAP4K4
ARHGDIA
HMGA2
HMGB2
LINC-PINT
H2BC15
IFNA1
NOS3
PRKCB
MIR31HG
CXCL12
MIR181D
AGT
TNIK
NR2C2
CUL1
SPI1
CAPZB
CCN1
MRTFA
MARCKS
FXR1
JUNB
IL2RB
PLAT
IGFBP7
CCR2
INHBA
DKK1
CALCA
SLC39A4
CIB1
CCL3
SLC39A3
MXD1
ITGAD
CXCL14
SLC39A2
PRKCA
H2AZ2
ENG
CCN2
H4C1
USP28
CAVIN1
H2BC21
LRBA
WRN
MAPKAPK3
SIN3A
LATS1
DKC1
DBN1
RFC1
MAP2K7
TERF2
EEF1E1
APOA1
G6PD
CCL5
DSP
RPIA
H2AC14
HES1
IGFBP2
MCAM
ARRB1
TTF2
CEBPZ
NR1H3
GBP1
ATF3
ACTL6A
SHC1
MPP1
RPS6KA1
KLF5
MIR483
TMPO-AS1
APC
FLG
ABCA1
NUMA1
H1-4
MVP
RAD50
GOT2
MT-TK
NOTCH3
SAMHD1
CDKN2B-AS1
MIR519D
LPL
EZR
POLR2A
H1-5
ASF1A
MORF4L1
SEPT5-GP1BB
MIR369
ENSG00000232995
CD9
SPHK2
GPX1
CDC27
MAGT1
PRMT6
MSH2
CLPP
RBBP4
DEGS1
DGCR5
TPP2
ROMO1
